# Supplementary material
Source: PubMed Central journal article supplement (PMC4413350)
Supplement: pnas.201409952SI.pdf [file pnas.201409952SI.pdf]

# Supporting Information

Barrio et al. 10.1073/pnas.1409952112

## SI Materials and Methods

**Cognitively Normal Control and AD Groups.** The CTRL group consisted of 28 subjects without any neurological or neuropsychiatric symptoms, 19 males and 9 females, with ages of 30–84 y (mean  $\pm$  SD: 64.3  $\pm$  14.1 y). The AD group consisted of 24 subjects with AD, 12 males and 12 females, with ages of 51–87 y (mean  $\pm$  SD: 73.5  $\pm$  9.7 y). Both CTRL and AD group subjects were scanned as a part of a larger study on [F-18]FDDNP PET imaging in aging and AD conducted earlier at UCLA, and their cortical [F-18]FDDNP values were reported previously (1). Their [F-18]FDDNP PET scans were reanalyzed for this study using a more complex set of ROIs as defined in *Materials and Methods* with additional regions that were not part of the previous publication (including ACG in the cortex, amygdala in the limbic medial temporal lobe, and a number of ROIs in sub-cortical regions). All PET scans of the CTRL and AD groups were performed at the UCLA Ahmanson Biomedical Imaging Center PET with the ECAT HR or ECAT EXACT HR+ scanner (Siemens CTI), with subjects in the supine position and with the imaging plane parallel to the orbito-meatal line. A bolus of FDDNP (320–550 MBq) was injected through an indwelling venous catheter, and consecutive dynamic PET scans were ob-

tained for 2 h. Scans were corrected for decay and reconstructed with the use of filtered back-projection (Hann filter, 5.5-mm full width at half maximum), with correction for scatter and measured attenuation. The resulting images contained either 47 contiguous slices with a plane separation of 3.37 mm (with the ECAT HR) or 63 contiguous slices with a plane separation of 2.42 mm (with the EXACT HR+). Imaging results did not differ significantly with the scanner used.

Subjects from the AD group met the standard diagnostic criteria of memory impairment, impairment in at least one other cognitive domain, gradual onset and progressive decline, and impaired occupational or social functioning or both (2, 3). Control subjects had normal cognitive functioning for their age and did not meet the criteria for mild cognitive impairment (4) or AD.

Subjects from the CTRL and AD groups who received an MRI scan were scanned on a 1.5-T (Signa) or 3T (General Electric or Siemens) scanner. For each of these subjects, 54 transverse planes were collected throughout the brain, superior to the cerebellum, with the use of a double-echo, fast spin-echo series with a 24-cm field of view and 256  $\times$  256 matrix and 3-mm slices with no gap [repetition time, 6,000 (3 T) or 2,000 (1.5 T); echo time, 17/85 (3 T) or 30/90 (1.5 T)] (1).

1. Small GW, et al. (2006) PET of brain amyloid and tau in mild cognitive impairment. *N Engl J Med* 355(25):2652–2663.
2. McKhann G, et al. (1984) Clinical diagnosis of Alzheimer's disease: Report of the NINCDS-ADRDA Work Group under the auspices of Department of Health and Human Services Task Force on Alzheimer's Disease. *Neurology* 34(7):939–944.

3. American Psychiatric Association (2000) *Diagnostic and Statistical Manual of Mental Disorders*, 4th Ed (American Psychiatric Association, Washington, DC).
4. Petersen RC (2004) Mild cognitive impairment as a diagnostic entity. *J Intern Med* 256(3):183–194.





# CHRONIC TRAUMATIC ENCEPHALOPATHY

## MACROSCOPIC tau immunohistochemistry

## MICROSCOPIC tau immunohistochemistry

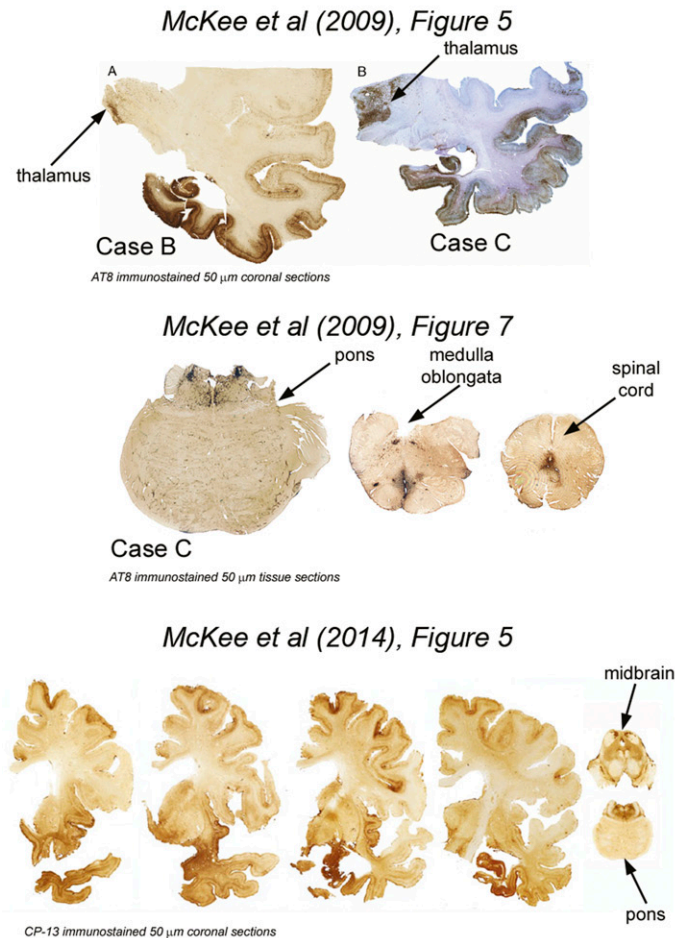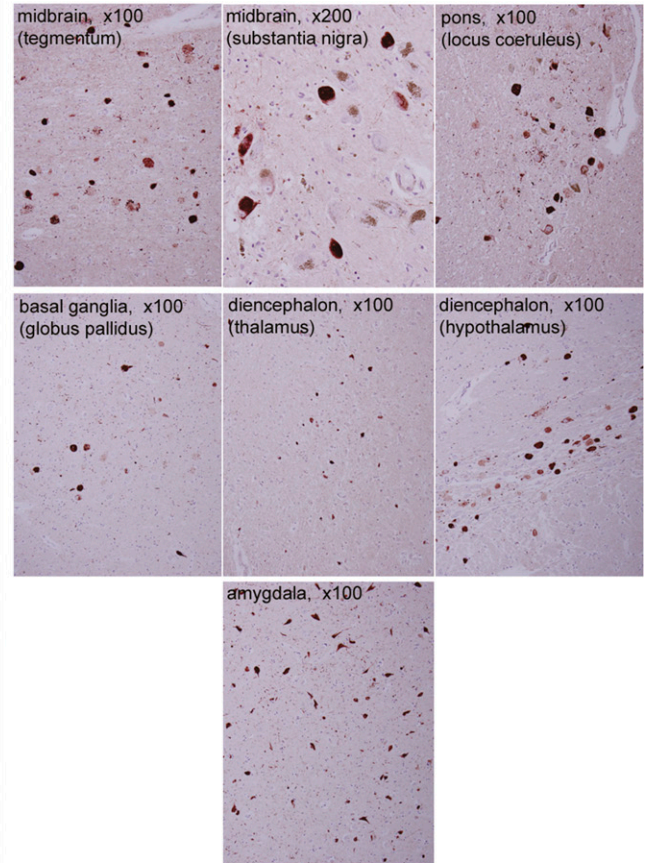

**Fig. S2.** CTE related hyperphosphorylated tau pathology distribution in subcortical brain regions. (*Left*) Examples of hyperphosphorylated tau immunohistochemistry (IHC) on brain tissue samples from CTE cases published in papers by McKee's group clearly show involvement of basal ganglia and diencephalon in stage IV as shown in refs. 1 and 2. The top and middle sections of the left panel show two cases of pathologically confirmed CTE with more advanced distribution of cortical pathology labeled as cases B and C in ref. 2: large coronally cut tissue sections of cases B and C clearly demonstrate tau IHC in thalamic region at variable levels in the upper section (figure 5 in ref. 2) and the middle section shows dense tau IHC in parts of pons, medulla oblongata, and spinal cord of case C (figure 7 in ref. 2); the bottom section shows a case of Australian rugby player with stage IV CTE with variable levels of tau IHC labeling throughout the cortex, basal ganglia, diencephalon, midbrain, and pons regions (figure 5 in ref. 1). Tissue samples from cases B and C (top and middle section, fully described in ref. 2) were independently analyzed as a part of analysis of neurochemical profile of dementia pugilistica (3), confirming McKee's observation. (*Right*) Additional evidence of the presence of tau deposits in subcortical structures of confirmed CTE is provided by tau IHC in microscopy slides performed on tissues samples from an 80-y-old retired NFL player from the CTE brain collection of Dr. Omalu. Different areas of midbrain (tegmentum, substantia nigra), pons (locus coeruleus), diencephalon (thalamus, hypothalamus), basal ganglia (globus pallidus), and amygdala clearly show presence of tau IHC positive aggregates. [*Top and Middle*, reproduced with permission from Wolters Kluwer Health; *Bottom*, reproduced with permission from Springer Science and Business Media.]

1. McKee AC, Daneshvar DH, Alvarez VE, Stein TD (2014) The neuropathology of sport. *Acta Neuropathol* 127(1):29-51.
2. McKee AC, et al. (2009) Chronic traumatic encephalopathy in athletes: Progressive tauopathy after repetitive head injury. *J Neuropathol Exp Neurol* 68(7):709-735.
3. Kokjohn TA, et al. (2013) Neurochemical profile of dementia pugilistica. *J Neurotrauma* 30(11):981-997.

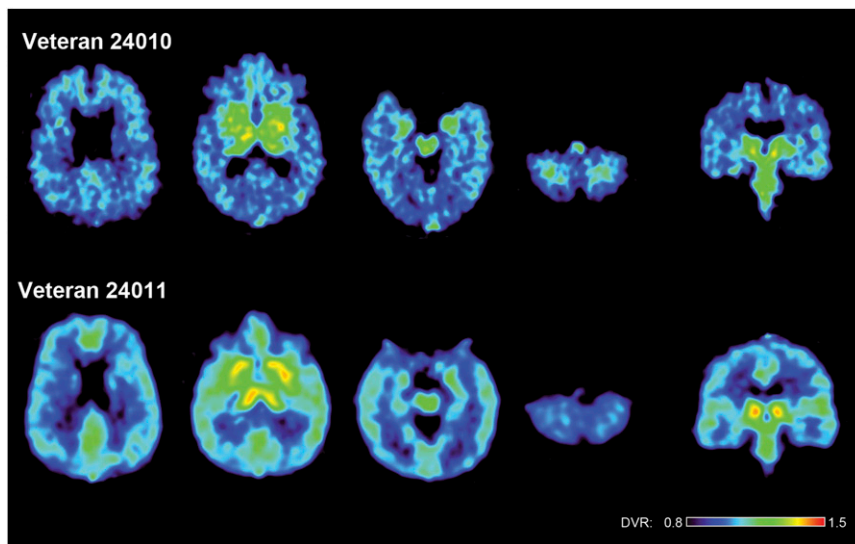

**Fig. S3.** [F-18]FDDNP DVR parametric images of the brains of two war veterans with the history of multiple blast concussions (mTBIs) during their war zone deployment. The upper row shows a 48-y-old male (veteran 24010) and the lower row a 36-y-old male (veteran 24011). Left four images in each row show transaxial brain images from top of the brain to the bottom. The right image shows a coronal cut through the midbrain. Note different [F-18]FDDNP signal distribution from the patterns T1–T4 described for retired professional American football players (Fig. 1) and a pattern of lower signal in midbrain and amygdala.

**Table S1. Pathology distribution in CTE (1)**

| CTE       | Hyperphosphorylated tau                                                                    | TDP-43                                                                                                        | $\beta$ -Amyloid                                                                                                      |
|-----------|--------------------------------------------------------------------------------------------|---------------------------------------------------------------------------------------------------------------|-----------------------------------------------------------------------------------------------------------------------|
| Stage I   | Focal perivascular NFTs at depth of cortical sulci                                         | Sparse TDP-43 neurites in cortex, medial temporal lobe, brainstem                                             | None                                                                                                                  |
| Stage II  | NFTs adjacent to focal epicenters, Nucleus basalis of Meynert, Locus coeruleus             | Sparse TDP-43 neurites in cortex, medial temporal lobe, brainstem                                             | 2 out of 14 cases                                                                                                     |
| Stage III | Dense: medial temporal lobes; Widespread: cortex, diencephalon, brainstem, and spinal cord | Sparse TDP-43 neurites in cortex, medial temporal lobe, brainstem                                             | 3 out of 15 cases                                                                                                     |
| Stage IV  | Dense and widespread throughout the brain including white matter                           | Severe intraneuronal and intragial inclusions in cortex, white matter, diencephalon, basal ganglia, brainstem | 9 out of 15 cases; as diffuse and neuritic plaques or vascular amyloid - but less than what required for AD diagnosis |

© Oxford University Press ([brain.oxfordjournals.org/content/136/1/43](http://brain.oxfordjournals.org/content/136/1/43)).

1. McKee AC, et al. (2013) The spectrum of disease in chronic traumatic encephalopathy. *Brain* 136(Pt 1):43–64.



**Table S4. mTBI group [F-18]FDDNP DVR values**

|       | Amygd | MTL   | Midb-V | Midb-D | Hypo-Th | Th    | Pons  | Str   | F     | ACG   | P     | PCG   | LTL   | Occ   |
|-------|-------|-------|--------|--------|---------|-------|-------|-------|-------|-------|-------|-------|-------|-------|
| TBI01 | 1.553 | 1.265 | 1.478  | 1.517  | 1.465   | 1.713 | 1.476 | 1.716 | 1.167 | 1.282 | 1.119 | 1.271 | 1.168 | 1.088 |
| TBI02 | 1.356 | 1.211 | 1.269  | 1.304  | 1.274   | 1.425 | 1.287 | 1.525 | 1.132 | 1.241 | 1.080 | 1.120 | 1.098 | 1.012 |
| TBI03 | 1.483 | 1.141 | 1.433  | 1.352  | 1.517   | 1.564 | 1.341 | 1.700 | 1.109 | 1.228 | 1.114 | 1.092 | 1.097 | 0.923 |
| TBI04 | 1.454 | 1.222 | 1.244  | 1.372  | 1.437   | 1.495 | 1.258 | 1.568 | 1.170 | 1.225 | 1.121 | 1.158 | 1.113 | 0.986 |
| TBI05 | 1.333 | 1.168 | 1.375  | 1.333  | 1.409   | 1.430 | 1.277 | 1.408 | 1.110 | 1.184 | 1.108 | 1.129 | 1.111 | 0.963 |
| TBI06 | 1.392 | 1.133 | 1.421  | 1.436  | 1.541   | 1.623 | 1.385 | 1.592 | 1.244 | 1.397 | 1.176 | 1.305 | 1.189 | 1.110 |
| TBI07 | 1.425 | 1.196 | 1.245  | 1.359  | 1.415   | 1.552 | 1.327 | 1.546 | 1.132 | 1.194 | 1.080 | 1.206 | 1.132 | 0.978 |
| TBI08 | 1.417 | 1.215 | 1.402  | 1.447  | 1.475   | 1.447 | 1.364 | 1.598 | 1.215 | 1.238 | 1.154 | 1.158 | 1.189 | 1.011 |
| TBI09 | 1.556 | 1.179 | 1.387  | 1.416  | 1.539   | 1.669 | 1.365 | 1.433 | 1.198 | 1.319 | 1.149 | 1.288 | 1.201 | 1.008 |
| TBI10 | 1.308 | 1.167 | 1.172  | 1.338  | 1.369   | 1.410 | 1.252 | 1.457 | 1.129 | 1.189 | 1.067 | 1.110 | 1.097 | 0.986 |
| TBI11 | 1.404 | 1.233 | 1.286  | 1.353  | 1.483   | 1.467 | 1.346 | 1.433 | 1.082 | 1.157 | 1.056 | 1.083 | 1.118 | 0.955 |
| TBI12 | 1.295 | 1.165 | 1.285  | 1.321  | 1.393   | 1.491 | 1.224 | 1.506 | 1.106 | 1.206 | 1.014 | 1.095 | 1.044 | 1.004 |
| TBI13 | 1.363 | 1.144 | 1.361  | 1.356  | 1.400   | 1.485 | 1.339 | 1.578 | 1.142 | 1.232 | 1.043 | 1.100 | 1.080 | 0.979 |
| TBI14 | 1.220 | 1.123 | 1.257  | 1.318  | 1.292   | 1.327 | 1.220 | 1.371 | 1.082 | 1.124 | 1.056 | 1.118 | 1.077 | 0.951 |

**Table S5. CTRL group [F-18]FDDNP DVR values**

|        | Amygd | MTL   | Midb-V | Midb-D | Hypo-Th | Th    | Pons  | Str   | F     | ACG   | P     | PCG   | LTL   | Occ   |
|--------|-------|-------|--------|--------|---------|-------|-------|-------|-------|-------|-------|-------|-------|-------|
| CTRL01 | 1.155 | 1.095 | 1.180  | 1.122  | 1.169   | 1.238 | 1.161 | 1.425 | 1.025 | 1.108 | 1.016 | 1.107 | 1.038 | 0.961 |
| CTRL02 | 1.124 | 1.145 | 1.179  | 1.162  | 1.300   | 1.233 | 1.193 | 1.210 | 1.005 | 1.064 | 1.052 | 1.126 | 1.054 | 0.948 |
| CTRL03 | 1.143 | 1.087 | 1.081  | 1.190  | 1.274   | 1.290 | 1.239 | 1.307 | 1.025 | 1.082 | 1.083 | 1.078 | 1.045 | 1.091 |
| CTRL04 | 1.135 | 1.074 | 1.081  | 1.141  | 1.331   | 1.403 | 1.149 | 1.421 | 1.045 | 1.118 | 1.042 | 1.076 | 1.047 | 0.983 |
| CTRL05 | 1.157 | 1.116 | 1.204  | 1.077  | 1.152   | 1.195 | 1.094 | 1.277 | 1.015 | 1.033 | 1.078 | 1.152 | 1.065 | 1.057 |
| CTRL06 | 1.138 | 1.073 | 1.165  | 1.193  | 1.240   | 1.058 | 1.194 | 1.390 | 1.056 | 1.002 | 1.007 | 1.016 | 1.046 | 1.005 |
| CTRL07 | 1.213 | 1.107 | 1.160  | 1.195  | 1.229   | 1.302 | 1.105 | 1.342 | 1.033 | 1.033 | 1.024 | 1.109 | 1.046 | 0.997 |
| CTRL08 | 1.170 | 1.123 | 1.080  | 1.088  | 1.214   | 1.410 | 1.257 | 1.423 | 1.059 | 1.159 | 1.033 | 1.040 | 1.079 | 1.014 |
| CTRL09 | 1.209 | 1.146 | 1.201  | 1.223  | 1.229   | 1.242 | 1.257 | 1.339 | 1.049 | 1.102 | 1.078 | 1.071 | 1.032 | 0.998 |
| CTRL10 | 1.096 | 1.095 | 1.140  | 1.139  | 1.222   | 1.350 | 1.173 | 1.399 | 1.123 | 1.136 | 1.068 | 1.074 | 1.072 | 1.051 |
| CTRL11 | 1.142 | 1.094 | 1.198  | 1.208  | 1.271   | 1.367 | 1.250 | 1.394 | 1.024 | 1.090 | 1.026 | 1.040 | 1.022 | 0.995 |
| CTRL12 | 1.162 | 1.081 | 1.136  | 1.142  | 1.204   | 1.277 | 1.147 | 1.277 | 0.978 | 1.014 | 1.017 | 1.088 | 1.058 | 0.955 |
| CTRL13 | 1.167 | 1.135 | 1.140  | 1.151  | 1.242   | 1.192 | 1.125 | 1.257 | 1.060 | 1.142 | 1.092 | 1.100 | 1.107 | 0.974 |
| CTRL14 | 1.205 | 1.138 | 1.135  | 1.162  | 1.260   | 1.315 | 1.260 | 1.417 | 1.073 | 1.146 | 1.070 | 1.085 | 1.071 | 0.985 |
| CTRL15 | 1.185 | 1.132 | 1.046  | 1.078  | 1.271   | 1.241 | 1.078 | 1.311 | 1.055 | 1.149 | 1.092 | 1.155 | 1.058 | 1.084 |
| CTRL16 | 1.189 | 1.122 | 1.096  | 1.195  | 1.269   | 1.225 | 0.997 | 1.287 | 1.043 | 1.153 | 1.074 | 1.114 | 1.076 | 1.107 |
| CTRL17 | 1.218 | 1.137 | 1.156  | 1.206  | 1.244   | 1.115 | 1.140 | 1.308 | 1.069 | 1.111 | 1.044 | 1.127 | 1.074 | 1.020 |
| CTRL18 | 1.123 | 1.102 | 1.067  | 1.061  | 1.141   | 1.123 | 1.048 | 1.188 | 1.005 | 1.075 | 1.092 | 1.097 | 1.068 | 1.072 |
| CTRL19 | 1.167 | 1.094 | 1.218  | 1.150  | 1.224   | 1.241 | 1.114 | 1.362 | 1.074 | 1.099 | 1.057 | 1.087 | 1.060 | 0.987 |
| CTRL20 | 1.147 | 1.136 | 1.145  | 1.064  | 1.227   | 1.222 | 1.056 | 1.309 | 1.066 | 1.119 | 1.062 | 1.061 | 1.022 | 1.031 |
| CTRL21 | 1.172 | 1.118 | 1.195  | 1.183  | 1.227   | 1.337 | 1.222 | 1.300 | 1.071 | 1.130 | 1.033 | 1.097 | 1.082 | 0.982 |
| CTRL22 | 1.102 | 1.101 | 1.039  | 1.096  | 1.163   | 1.170 | 1.069 | 1.282 | 0.996 | 1.090 | 1.025 | 1.035 | 1.066 | 0.998 |
| CTRL23 | 1.122 | 1.105 | 1.056  | 1.046  | 1.174   | 1.163 | 1.102 | 1.224 | 0.988 | 1.042 | 1.059 | 0.984 | 1.102 | 0.998 |
| CTRL24 | 1.106 | 1.084 | 1.051  | 1.072  | 1.169   | 1.193 | 0.990 | 1.197 | 1.038 | 1.076 | 1.027 | 1.116 | 1.023 | 0.979 |
| CTRL25 | 1.205 | 1.131 | 1.151  | 1.169  | 1.242   | 1.339 | 1.151 | 1.355 | 1.072 | 1.119 | 1.077 | 1.052 | 1.102 | 1.051 |
| CTRL26 | 1.224 | 1.147 | 1.236  | 1.195  | 1.321   | 1.296 | 1.195 | 1.327 | 1.047 | 1.098 | 1.093 | 1.055 | 1.059 | 1.074 |
| CTRL27 | 1.173 | 1.102 | 1.108  | 1.066  | 1.277   | 1.226 | 1.146 | 1.306 | 1.009 | 1.057 | 1.051 | 1.042 | 1.097 | 1.111 |
| CTRL28 | 1.177 | 1.112 | 1.138  | 1.079  | 1.269   | 1.231 | 1.144 | 1.368 | 0.999 | 1.069 | 1.036 | 1.115 | 1.115 | 1.072 |

**Table S6. AD group [F-18]FDDNP DVR values**

|      | Amygd | MTL   | Midb-V | Midb-D | Hypo-Th | Th    | Pons  | Str   | F     | ACG   | P     | PCG   | LTL   | Occ   |
|------|-------|-------|--------|--------|---------|-------|-------|-------|-------|-------|-------|-------|-------|-------|
| AD01 | 1.159 | 1.194 | 1.108  | 1.234  | 1.157   | 1.154 | 1.236 | 1.321 | 1.126 | 1.192 | 1.121 | 1.165 | 1.201 | 1.092 |
| AD02 | 1.380 | 1.209 | 1.196  | 1.140  | 1.348   | 1.477 | 1.267 | 1.500 | 1.148 | 1.213 | 1.172 | 1.175 | 1.179 | 1.039 |
| AD03 | 1.288 | 1.176 | 1.123  | 1.155  | 1.215   | 1.241 | 1.190 | 1.343 | 1.108 | 1.158 | 1.143 | 1.193 | 1.122 | 1.019 |
| AD04 | 1.242 | 1.180 | 1.130  | 1.111  | 1.168   | 1.190 | 1.116 | 1.179 | 1.137 | 1.055 | 1.153 | 1.162 | 1.138 | 1.053 |
| AD05 | 1.235 | 1.174 | 1.156  | 1.103  | 1.219   | 1.477 | 1.220 | 1.294 | 1.096 | 1.029 | 1.191 | 1.209 | 1.175 | 1.068 |
| AD06 | 1.308 | 1.200 | 1.078  | 1.094  | 1.236   | 1.235 | 1.202 | 1.361 | 1.112 | 1.045 | 1.173 | 1.203 | 1.143 | 1.035 |
| AD07 | 1.173 | 1.176 | 1.085  | 1.143  | 1.165   | 1.332 | 1.065 | 1.301 | 1.123 | 1.144 | 1.177 | 1.181 | 1.140 | 1.224 |
| AD08 | 1.205 | 1.199 | 1.188  | 1.270  | 1.288   | 1.402 | 1.222 | 1.288 | 1.108 | 1.137 | 1.097 | 1.182 | 1.159 | 0.981 |
| AD09 | 1.220 | 1.192 | 1.196  | 1.118  | 1.237   | 1.346 | 1.096 | 1.371 | 1.075 | 1.125 | 1.136 | 1.156 | 1.163 | 1.065 |
| AD10 | 1.173 | 1.174 | 1.071  | 1.042  | 1.309   | 1.365 | 1.120 | 1.298 | 1.101 | 0.999 | 1.146 | 1.200 | 1.118 | 1.084 |
| AD11 | 1.196 | 1.185 | 1.090  | 1.207  | 1.263   | 1.304 | 1.198 | 1.353 | 1.113 | 1.183 | 1.168 | 1.143 | 1.171 | 1.110 |
| AD12 | 1.159 | 1.198 | 1.069  | 1.097  | 1.144   | 1.276 | 1.149 | 1.392 | 1.052 | 1.179 | 1.128 | 1.166 | 1.151 | 1.034 |
| AD13 | 1.217 | 1.190 | 1.280  | 1.311  | 1.282   | 1.168 | 1.129 | 1.301 | 1.085 | 1.200 | 1.184 | 1.184 | 1.124 | 1.075 |
| AD14 | 1.271 | 1.164 | 1.162  | 1.271  | 1.170   | 1.274 | 1.240 | 1.287 | 1.094 | 1.054 | 1.146 | 1.161 | 1.128 | 1.061 |
| AD15 | 1.277 | 1.196 | 1.145  | 1.227  | 1.206   | 1.277 | 1.190 | 1.331 | 1.077 | 1.065 | 1.068 | 1.213 | 1.135 | 1.119 |
| AD16 | 1.243 | 1.207 | 1.089  | 1.043  | 1.148   | 1.159 | 0.997 | 1.174 | 1.115 | 1.092 | 1.150 | 1.204 | 1.146 | 1.095 |
| AD17 | 1.326 | 1.251 | 1.134  | 1.147  | 1.218   | 1.257 | 1.138 | 1.290 | 1.108 | 1.185 | 1.109 | 1.170 | 1.203 | 1.083 |
| AD18 | 1.239 | 1.179 | 1.138  | 1.149  | 1.260   | 1.261 | 1.095 | 1.345 | 1.096 | 1.094 | 1.119 | 1.137 | 1.151 | 0.973 |
| AD19 | 1.276 | 1.196 | 1.034  | 1.084  | 1.228   | 1.403 | 1.188 | 1.477 | 1.142 | 1.227 | 1.166 | 1.168 | 1.188 | 1.006 |
| AD20 | 1.218 | 1.189 | 1.126  | 1.177  | 1.219   | 1.280 | 1.080 | 1.393 | 1.104 | 1.249 | 1.157 | 1.162 | 1.151 | 1.116 |
| AD21 | 1.264 | 1.157 | 1.102  | 1.126  | 1.171   | 1.330 | 1.151 | 1.255 | 1.108 | 1.120 | 1.154 | 1.167 | 1.154 | 1.038 |
| AD22 | 1.330 | 1.206 | 1.264  | 1.251  | 1.332   | 1.559 | 1.190 | 1.477 | 1.142 | 1.181 | 1.147 | 1.192 | 1.173 | 0.951 |
| AD23 | 1.146 | 1.157 | 1.103  | 1.131  | 1.289   | 1.454 | 1.126 | 1.523 | 1.163 | 1.200 | 1.195 | 1.208 | 1.165 | 1.051 |
| AD24 | 1.267 | 1.192 | 1.215  | 1.296  | 1.233   | 1.422 | 1.150 | 1.414 | 1.163 | 1.264 | 1.151 | 1.215 | 1.137 | 1.046 |

**Table S7. mTBI group Z-score values**

|       | Amygd  | MTL   | Midb-V | Midb-D | Hypo-Th | Th    | Pons  | Str   | F     | ACG   | P      | PCG   | LTL    | Occ    |
|-------|--------|-------|--------|--------|---------|-------|-------|-------|-------|-------|--------|-------|--------|--------|
| TBI01 | 10.824 | 6.782 | 6.069  | 6.903  | 4.702   | 5.420 | 4.400 | 5.704 | 3.885 | 4.372 | 2.443  | 4.711 | 4.053  | 1.412  |
| TBI02 | 5.381  | 4.379 | 2.363  | 3.032  | 0.814   | 2.044 | 1.892 | 2.941 | 2.815 | 3.427 | 0.966  | 0.953 | 1.322  | -0.179 |
| TBI03 | 8.885  | 1.304 | 5.276  | 3.901  | 5.769   | 3.678 | 2.599 | 5.466 | 2.133 | 3.138 | 2.264  | 0.247 | 1.294  | -2.057 |
| TBI04 | 8.097  | 4.882 | 1.927  | 4.271  | 4.130   | 2.872 | 1.508 | 3.562 | 3.978 | 3.058 | 2.547  | 1.902 | 1.931  | -0.728 |
| TBI05 | 4.747  | 2.484 | 4.251  | 3.558  | 3.552   | 2.104 | 1.752 | 1.246 | 2.143 | 2.107 | 2.044  | 1.177 | 1.824  | -1.202 |
| TBI06 | 6.364  | 0.945 | 5.066  | 5.438  | 6.251   | 4.358 | 3.193 | 3.910 | 6.227 | 7.054 | 4.606  | 5.552 | 4.874  | 1.865  |
| TBI07 | 7.287  | 3.698 | 1.946  | 4.038  | 3.678   | 3.530 | 2.421 | 3.251 | 2.837 | 2.348 | 0.988  | 3.102 | 2.659  | -0.902 |
| TBI08 | 7.060  | 4.576 | 4.725  | 5.631  | 4.898   | 2.303 | 2.911 | 4.001 | 5.370 | 3.360 | 3.766  | 1.901 | 4.882  | -0.197 |
| TBI09 | 10.903 | 2.984 | 4.455  | 5.060  | 6.201   | 4.901 | 2.926 | 1.608 | 4.851 | 5.236 | 3.593  | 5.150 | 5.322  | -0.267 |
| TBI10 | 4.049  | 2.422 | 0.655  | 3.656  | 2.738   | 1.869 | 1.423 | 1.962 | 2.732 | 2.218 | 0.484  | 0.687 | 1.294  | -0.726 |
| TBI11 | 6.719  | 5.366 | 2.665  | 3.925  | 5.066   | 2.539 | 2.664 | 1.609 | 1.313 | 1.479 | 0.060  | 0.019 | 2.105  | -1.371 |
| TBI12 | 3.690  | 2.356 | 2.652  | 3.342  | 3.233   | 2.819 | 1.046 | 2.672 | 2.031 | 2.611 | -1.501 | 0.313 | -0.779 | -0.352 |
| TBI13 | 5.575  | 1.440 | 4.000  | 3.981  | 3.371   | 2.745 | 2.574 | 3.710 | 3.137 | 3.217 | -0.398 | 0.453 | 0.644  | -0.874 |
| TBI14 | 1.615  | 0.497 | 2.159  | 3.285  | 1.183   | 0.903 | 1.004 | 0.717 | 1.304 | 0.701 | 0.091  | 0.893 | 0.500  | -1.460 |

Z-score defined as  $(DVR_{(mTBI-ROI)} - DVR_{(CTRLgroup-mean)})/SD_{(CTRLgroup)}$ ; CTRL group DVR mean values and SDs for each ROI are provided in the Table 2.



**Table S8. CTRL group Z-score values**

|        | Amygd  | MTL    | Midb-V | Midb-D | Hypo-Th | Th     | Pons   | Str    | F      | ACG    | P      | PCG    | LTL    | Occ    |
|--------|--------|--------|--------|--------|---------|--------|--------|--------|--------|--------|--------|--------|--------|--------|
| CTRL01 | -0.194 | -0.755 | 0.791  | -0.286 | -1.324  | -0.139 | 0.218  | 1.493  | -0.433 | 0.331  | -1.421 | 0.623  | -1.002 | -1.246 |
| CTRL02 | -1.048 | 1.460  | 0.778  | 0.445  | 1.352   | -0.192 | 0.639  | -1.607 | -1.050 | -0.685 | -0.086 | 1.104  | -0.374 | -1.517 |
| CTRL03 | -0.505 | -1.099 | -0.958 | 0.954  | 0.813   | 0.474  | 1.246  | -0.209 | -0.447 | -0.263 | 1.085  | -0.092 | -0.744 | 1.483  |
| CTRL04 | -0.728 | -1.667 | -0.965 | 0.064  | 1.980   | 1.793  | 0.050  | 1.440  | 0.170  | 0.574  | -0.451 | -0.164 | -0.641 | -0.793 |
| CTRL05 | -0.137 | 0.175  | 1.220  | -1.095 | -1.669  | -0.639 | -0.673 | -0.649 | -0.727 | -1.399 | 0.898  | 1.755  | 0.043  | 0.751  |
| CTRL06 | -0.646 | -1.713 | 0.523  | 1.009  | 0.112   | -2.248 | 0.658  | 0.996  | 0.494  | -2.125 | -1.755 | -1.657 | -0.703 | -0.323 |
| CTRL07 | 1.432  | -0.231 | 0.441  | 1.049  | -0.094  | 0.615  | -0.535 | 0.295  | -0.197 | -1.402 | -1.139 | 0.665  | -0.668 | -0.504 |
| CTRL08 | 0.233  | 0.502  | -0.981 | -0.912 | -0.414  | 1.872  | 1.483  | 1.465  | 0.592  | 1.528  | -0.781 | -1.049 | 0.591  | -0.144 |
| CTRL09 | 1.307  | 1.500  | 1.173  | 1.551  | -0.107  | -0.093 | 1.493  | 0.246  | 0.307  | 0.191  | 0.923  | -0.269 | -1.223 | -0.482 |
| CTRL10 | -1.816 | -0.728 | 0.093  | 0.026  | -0.242  | 1.170  | 0.370  | 1.123  | 2.560  | 0.984  | 0.525  | -0.200 | 0.323  | 0.640  |
| CTRL11 | -0.542 | -0.777 | 1.120  | 1.281  | 0.750   | 1.375  | 1.396  | 1.049  | -0.478 | -0.077 | -1.046 | -1.053 | -1.627 | -0.544 |
| CTRL12 | 0.016  | -1.379 | 0.016  | 0.084  | -0.622  | 0.322  | 0.032  | -0.638 | -1.868 | -1.856 | -1.395 | 0.145  | -0.235 | -1.372 |
| CTRL13 | 0.144  | 1.007  | 0.088  | 0.250  | 0.166   | -0.671 | -0.269 | -0.926 | 0.617  | 1.122  | 1.444  | 0.440  | 1.690  | -0.988 |
| CTRL14 | 1.185  | 1.148  | 0.000  | 0.447  | 0.532   | 0.763  | 1.532  | 1.386  | 1.024  | 1.221  | 0.599  | 0.063  | 0.267  | -0.741 |
| CTRL15 | 0.645  | 0.879  | -1.570 | -1.093 | 0.747   | -0.106 | -0.885 | -0.155 | 0.489  | 1.302  | 1.425  | 1.821  | -0.238 | 1.330  |
| CTRL16 | 0.756  | 0.458  | -0.684 | 1.046  | 0.714   | -0.290 | -1.956 | -0.499 | 0.110  | 1.377  | 0.755  | 0.786  | 0.495  | 1.814  |
| CTRL17 | 1.557  | 1.108  | 0.366  | 1.250  | 0.199   | -1.572 | -0.066 | -0.202 | 0.907  | 0.412  | -0.362 | 1.123  | 0.383  | -0.020 |
| CTRL18 | -1.076 | -0.437 | -1.198 | -1.390 | -1.900  | -1.483 | -1.286 | -1.932 | -1.034 | -0.424 | 1.443  | 0.373  | 0.159  | 1.068  |
| CTRL19 | 0.159  | -0.781 | 1.467  | 0.227  | -0.206  | -0.102 | -0.403 | 0.584  | 1.064  | 0.126  | 0.116  | 0.119  | -0.160 | -0.709 |
| CTRL20 | -0.396 | 1.073  | 0.170  | -1.338 | -0.145  | -0.331 | -1.183 | -0.174 | 0.810  | 0.600  | 0.319  | -0.515 | -1.631 | 0.210  |
| CTRL21 | 0.280  | 0.275  | 1.053  | 0.823  | -0.138  | 1.018  | 1.018  | -0.304 | 0.969  | 0.849  | -0.781 | 0.363  | 0.691  | -0.804 |
| CTRL22 | -1.652 | -0.489 | -1.702 | -0.752 | -1.445  | -0.934 | -1.004 | -0.573 | -1.326 | -0.079 | -1.077 | -1.176 | 0.077  | -0.474 |
| CTRL23 | -1.091 | -0.295 | -1.397 | -1.668 | -1.231  | -1.013 | -0.571 | -1.410 | -1.560 | -1.188 | 0.179  | -2.452 | 1.501  | -0.481 |
| CTRL24 | -1.548 | -1.234 | -1.489 | -1.197 | -1.320  | -0.663 | -2.057 | -1.805 | -0.040 | -0.414 | -1.000 | 0.838  | -1.578 | -0.876 |
| CTRL25 | 1.192  | 0.868  | 0.280  | 0.563  | 0.153   | 1.043  | 0.082  | 0.478  | 0.995  | 0.601  | 0.870  | -0.760 | 1.489  | 0.628  |
| CTRL26 | 1.718  | 1.546  | 1.788  | 1.043  | 1.764   | 0.534  | 0.666  | 0.080  | 0.233  | 0.111  | 1.492  | -0.671 | -0.200 | 1.113  |
| CTRL27 | 0.320  | -0.436 | -0.474 | -1.306 | 0.865   | -0.285 | 0.019  | -0.226 | -0.934 | -0.849 | -0.099 | -0.991 | 1.306  | 1.901  |
| CTRL28 | 0.437  | 0.022  | 0.053  | -1.073 | 0.711   | -0.219 | -0.013 | 0.672  | -1.244 | -0.568 | -0.679 | 0.831  | 2.005  | 1.081  |

Z-score defined as  $(DVR_{(CTRL-ROI)} - DVR_{(CTRLgroup-mean)})/SD_{(CTRLgroup)}$ ; CTRL group DVR mean values and SDs for each ROI are provided in the Table 2.

**Table S9. AD group Z-score values**

|      | Amygd  | MTL   | Midb-V | Midb-D | Hypo-Th | Th     | Pons   | Str    | F     | ACG    | P     | PCG   | LTL   | Occ    |
|------|--------|-------|--------|--------|---------|--------|--------|--------|-------|--------|-------|-------|-------|--------|
| AD01 | -0.070 | 3.644 | -0.486 | 1.760  | -1.571  | -1.126 | 1.215  | -0.005 | 2.643 | 2.298  | 2.540 | 2.062 | 5.327 | 1.495  |
| AD02 | 6.054  | 4.312 | 1.086  | 0.048  | 2.312   | 2.650  | 1.616  | 2.572  | 3.314 | 2.771  | 4.440 | 2.314 | 4.495 | 0.383  |
| AD03 | 3.508  | 2.814 | -0.216 | 0.312  | -0.385  | -0.101 | 0.593  | 0.318  | 2.098 | 1.492  | 3.375 | 2.777 | 2.250 | -0.046 |
| AD04 | 2.230  | 3.008 | -0.088 | -0.490 | -1.345  | -0.699 | -0.383 | -2.060 | 2.979 | -0.904 | 3.754 | 2.004 | 2.885 | 0.669  |
| AD05 | 2.026  | 2.727 | 0.373  | -0.633 | -0.317  | 2.658  | 1.002  | -0.398 | 1.737 | -1.492 | 5.166 | 3.166 | 4.309 | 0.985  |
| AD06 | 4.041  | 3.882 | -1.013 | -0.795 | 0.048   | -0.179 | 0.762  | 0.574  | 2.208 | -1.130 | 4.501 | 3.030 | 3.086 | 0.309  |
| AD07 | 0.324  | 2.815 | -0.888 | 0.103  | -1.405  | 0.960  | -1.054 | -0.299 | 2.565 | 1.171  | 4.641 | 2.463 | 2.956 | 4.267  |
| AD08 | 1.193  | 3.866 | 0.944  | 2.406  | 1.107   | 1.774  | 1.021  | -0.487 | 2.092 | 1.015  | 1.607 | 2.503 | 3.713 | -0.828 |
| AD09 | 1.618  | 3.536 | 1.085  | -0.355 | 0.049   | 1.126  | -0.651 | 0.721  | 1.100 | 0.735  | 3.082 | 1.835 | 3.849 | 0.929  |
| AD10 | 0.321  | 2.766 | -1.138 | -1.743 | 1.523   | 1.344  | -0.335 | -0.335 | 1.868 | -2.207 | 3.484 | 2.943 | 2.114 | 1.337  |
| AD11 | 0.941  | 3.219 | -0.800 | 1.261  | 0.591   | 0.633  | 0.707  | 0.457  | 2.242 | 2.088  | 4.323 | 1.514 | 4.148 | 1.876  |
| AD12 | -0.086 | 3.806 | -1.172 | -0.745 | -1.834  | 0.307  | 0.053  | 1.015  | 0.381 | 1.997  | 2.781 | 2.096 | 3.397 | 0.286  |
| AD13 | 1.525  | 3.441 | 2.556  | 3.156  | 0.984   | -0.955 | -0.214 | -0.294 | 1.390 | 2.477  | 4.910 | 2.541 | 2.344 | 1.144  |
| AD14 | 3.013  | 2.315 | 0.468  | 2.419  | -1.297  | 0.281  | 1.258  | -0.498 | 1.666 | -0.921 | 3.465 | 1.972 | 2.499 | 0.844  |
| AD15 | 3.202  | 3.726 | 0.174  | 1.632  | -0.569  | 0.318  | 0.595  | 0.132  | 1.143 | -0.661 | 0.542 | 3.279 | 2.786 | 2.061  |
| AD16 | 2.245  | 4.217 | -0.810 | -1.724 | -1.746  | -1.067 | -1.969 | -2.127 | 2.320 | -0.029 | 3.632 | 3.037 | 3.203 | 1.566  |
| AD17 | 4.557  | 6.143 | -0.016 | 0.171  | -0.326  | 0.080  | -0.097 | -0.454 | 2.098 | 2.125  | 2.092 | 2.183 | 5.415 | 1.304  |
| AD18 | 2.151  | 2.967 | 0.056  | 0.204  | 0.519   | 0.129  | -0.660 | 0.344  | 1.718 | 0.017  | 2.464 | 1.375 | 3.397 | -0.992 |
| AD19 | 3.166  | 3.735 | -1.790 | -0.983 | -0.131  | 1.792  | 0.567  | 2.245  | 3.124 | 3.095  | 4.218 | 2.132 | 4.814 | -0.305 |
| AD20 | 1.566  | 3.415 | -0.155 | 0.716  | -0.303  | 0.348  | -0.860 | 1.031  | 1.966 | 3.607  | 3.900 | 1.984 | 3.405 | 2.000  |
| AD21 | 2.829  | 2.012 | -0.581 | -0.215 | -1.293  | 0.939  | 0.079  | -0.955 | 2.086 | 0.628  | 3.775 | 2.130 | 3.492 | 0.352  |
| AD22 | 4.656  | 4.147 | 2.275  | 2.063  | 1.993   | 3.612  | 0.594  | 2.253  | 3.133 | 2.024  | 3.508 | 2.750 | 4.227 | -1.467 |
| AD23 | -0.435 | 1.977 | -0.570 | -0.126 | 1.108   | 2.389  | -0.249 | 2.918  | 3.778 | 2.489  | 5.329 | 3.132 | 3.949 | 0.633  |
| AD24 | 2.901  | 3.540 | 1.414  | 2.875  | -0.032  | 2.015  | 0.072  | 1.336  | 3.761 | 3.964  | 3.645 | 3.327 | 2.849 | 0.535  |

Z-score defined as  $(DVR_{(AD-ROI)} - DVR_{(CTRLgroup-mean)})/SD_{(CTRLgroup)}$ ; CTRL group DVR mean values and SDs for each ROI are provided in the Table 2.
